# Supplementary material
Source: HighWire-hosted journal article supplement (https://heart.bmj.com/content/heartjnl-2021-319273)
Supplement: inline-supplementary-material-1 [file inline-supplementary-material-1.pdf]

**Supplementary index****Table 1:** Summary of relevant studies cited in our paper

| Study authors             | Study design                                      | Cardiac condition                                  | Number of patients              | Type of fasting | Study objective                                                                                                           | Follow up duration                                                          | Main findings                                                                                                                                                                                                                                                                                                                                                                                       | Conclusion                                                                                                                                                                                                                                                              |
|---------------------------|---------------------------------------------------|----------------------------------------------------|---------------------------------|-----------------|---------------------------------------------------------------------------------------------------------------------------|-----------------------------------------------------------------------------|-----------------------------------------------------------------------------------------------------------------------------------------------------------------------------------------------------------------------------------------------------------------------------------------------------------------------------------------------------------------------------------------------------|-------------------------------------------------------------------------------------------------------------------------------------------------------------------------------------------------------------------------------------------------------------------------|
| Abazid et al 2018         | Prospective nonrandomised study                   | HFrEF                                              | 249                             | Ramadan fasting | % of patients who became haemodynamic instability and their clinical profile                                              | ?1 month (Ramadan)                                                          | -92% of patients remained haemodynamically stable<br>-Profile of patients who became haemodynamically unstable:<br>--higher initial NYHA class (2.19±0.9 vs. 1.6±0.8)<br>--less adherence to medications (67% vs 94%)<br>--less likely to have ischaemic cardiomyopathy (33% vs 57%)                                                                                                                | “In most patients with chronic HFrEF, Ramadan fasting is considered safe. Non-adherence to medication and diet are significantly associated with decompensated heart failure during Ramadan”                                                                            |
| Al Suwaidi et al 2005     | Retrospective review population-based study       | HFrEF                                              | 20,856 Qatari                   | Ramadan fasting | Whether Ramadan fasting has any effect on the number of hospitalisations for HFrEF in a geographically defined population | Records over a 10-year period were reviewed (January 1991 to December 2001) | -The number of hospitalisations for HFrEF was not significantly different in Ramadan (208 cases) when compared to a month before Ramadan (182 cases) and a month after Ramadan (198 cases) p>0.37.<br>-There was no significant difference found in the baseline clinical characteristics or mortality (11.5%, 7.7% and 9.6%, respectively; p>0.43) in patients presenting in various time periods. | In this defined population, no significant difference was found in number of hospitalisations for HFrEF while fasting in Ramadan when compared to non-fasting months                                                                                                    |
| Aslam M and Healy MA 1986 | Prospective review                                | Not specified. 3 out of 81 had cardiac conditions. | 81 Asian                        | Ramadan fasting | Medication compliance during Ramadan fasting                                                                              | 1 month (Ramadan)                                                           | -35 patients missed doses<br>-8 patients took their tablets at different times<br>-4 patients took all their medication as one single daily dose while breaking their fast in the evening                                                                                                                                                                                                           | Medication noncompliance remains a significant problem with patients fasting in Ramadan                                                                                                                                                                                 |
| Babineaux SM et al 2015   | Multi-country, retrospective, observational study | Type 2 Diabetes Mellitus                           | 3777 patients<br>508 physicians | Ramadan fasting | To describe the characteristics and management of patients with diabetes who chose to fast in Ramadan in 2010             | ?3 months                                                                   | -Oral antihyperglycemic therapy was the predominant pre-Ramadan therapy for most patients (76.6%)<br>-Treatment regime was modified before Ramadan for 39.3% of all patients<br>-Almost all physicians (96.2%) reported provided fasting-specific advice to patients<br>-62.6% of physicians report using guidelines or recommendations for the management of diabetes during Ramadan               | Physicians have increasingly adopted multiple approaches to the management of fasting during Ramadan, including the adoption of international and/or national guidelines, such that patients are able to fast for a greater number of days without acute complications. |

|                      |                                                 |                                                                                                 |                |                                            |                                                                                                                                          |          |                                                                                                                                                                                                                                                                                                                                                                                                                                                                                                                                                                                                                                                                                                                                           |                                                                                                                                                                                                                                                                                                                                                                                                                                               |
|----------------------|-------------------------------------------------|-------------------------------------------------------------------------------------------------|----------------|--------------------------------------------|------------------------------------------------------------------------------------------------------------------------------------------|----------|-------------------------------------------------------------------------------------------------------------------------------------------------------------------------------------------------------------------------------------------------------------------------------------------------------------------------------------------------------------------------------------------------------------------------------------------------------------------------------------------------------------------------------------------------------------------------------------------------------------------------------------------------------------------------------------------------------------------------------------------|-----------------------------------------------------------------------------------------------------------------------------------------------------------------------------------------------------------------------------------------------------------------------------------------------------------------------------------------------------------------------------------------------------------------------------------------------|
|                      |                                                 |                                                                                                 |                |                                            |                                                                                                                                          |          | -64% of patients reported fasting every day of Ramadan<br>-94.2% of patients fasted for at least 15 days                                                                                                                                                                                                                                                                                                                                                                                                                                                                                                                                                                                                                                  |                                                                                                                                                                                                                                                                                                                                                                                                                                               |
| Batarfi A et al 2020 | Multi-center cross-sectional study              | Patients receiving oral anticoagulation (heart valve disease, rhythm disorder, vein thrombosis) | 808 patients   | Ramadan fasting                            | To characterise patient-guided modification of oral anticoagulation intake during Ramadan and any associated complications from doing so | 3 months | -68.4% of patients were taking warfarin, 31.6% were taking a direct oral anticoagulant<br>-19.1% of patients were prescribed twice daily anticoagulation<br>-During Ramadan, 46.9% of patients reported taking their anticoagulation as prescribed to them.<br>-The remaining 53.1% of patients reported modifying drug intake in different ways (31.1% adjusting the time of intake, 13.2% skipped intakes and 2.2% double dosed).<br>-Twice daily anticoagulation was a strong independent predictor for modification during Ramadan<br>-The rate of hospital admission due to either bleeding or thromboembolic complications was higher in patients that modified treatment regimens (15.4%) as compared to adherent patients (6.6%). | Patient-guided modification of oral anticoagulation regime is common during Ramadan. Patients on twice daily anticoagulation are more likely to modify their treatment regime and are more likely to encounter bleeding or thromboembolic complications as a result. Patient education and, where possible, pre-Ramadan modification of treatment regimes may help avoid complications from patient non-compliance or uninformed adjustments. |
| Kul S et al 2014     | Meta-analysis of self-controlled cohort studies | Healthy population                                                                              | 1,476 patients | Ramadan fasting                            | What effect does Ramadan fasting have on body weight, serum lipid levels and fasting blood glucose before and after Ramadan              |          | -After Ramadan fasting, low-density lipoprotein and fasting blood glucose levels were decreased in both males and females compared to levels prior to Ramadan.<br>-In females, body weight, total cholesterol and triglyceride levels remain unchanged, while high density lipoprotein levels were increased.<br>-In males, Ramadan fasting resulted in weight loss, a significant decrease in total cholesterol and low-density lipoprotein levels and a small decrease in triglyceride levels.                                                                                                                                                                                                                                          | Ramadan fasting can effectively change body weight and some biochemical parameters in healthy subjects especially in males compared to pre-Ramadan period                                                                                                                                                                                                                                                                                     |
| Okoshi K et al 2019  | Animal study                                    | Wistar rats with induced myocardial infarction                                                  | N/A            | Intermittent fasting (fed every other day) | To compare the effects of intermittent fasting before and after myocardial infarction on rat cardiac remodelling and survival            | 3 months | -Final body weight and total mortality was lower in the intermittent fasting rats when compared to fasts fed every day.<br>-At baseline, there was no difference in echocardiographic parameters.<br>-12 weeks after MI was induced, intermittent fasting rats had a smaller posterior left ventricular wall thickness, reduced MI size, myocyte diameter and left ventricular volume.                                                                                                                                                                                                                                                                                                                                                    | Intermittent fasting initiated before or after MI reduces myocyte hypertrophy and LV dilatation.<br>Myocardial fibrosis and fetal gene expression are not modulated by feeding regimens.<br>Benefit is more evident when intermittent fasting is initiated before rather than after MI.                                                                                                                                                       |

|                      |                                               |                                                                                                                                                              |                |                      |                                                                                                                                                                         |                   |                                                                                                                                                                                                                                                                                                                                                                                          |                                                                                                                                                                                                                                                                                                                                                    |
|----------------------|-----------------------------------------------|--------------------------------------------------------------------------------------------------------------------------------------------------------------|----------------|----------------------|-------------------------------------------------------------------------------------------------------------------------------------------------------------------------|-------------------|------------------------------------------------------------------------------------------------------------------------------------------------------------------------------------------------------------------------------------------------------------------------------------------------------------------------------------------------------------------------------------------|----------------------------------------------------------------------------------------------------------------------------------------------------------------------------------------------------------------------------------------------------------------------------------------------------------------------------------------------------|
| Ma X et al 2019      | Animal study                                  | Mice with induced proteotoxic cardiomyopathy                                                                                                                 | N/A            | Intermittent fasting | To test whether TFEB (a master regulator of the autophagy-lysosomal pathway) activation in the myocardium can be harnessed to treat advanced proteotoxic cardiomyopathy |                   | In mice with induced advanced proteotoxic cardiomyopathy, intermittent fasting resulted in restored lysosomal abundance and autophagic flux. Left ventricular dilatation and myocardial hypertrophy was also attenuated, with mice demonstrating increased percentage fractional shortening and increased survival.                                                                      | Intermittent fasting and TFEB activation are clinically relevant therapeutic strategies to rescue advanced proteotoxic cardiomyopathy by normalising desmin localisation via autophagy-dependent and autophagy-independent mechanisms.                                                                                                             |
| Mousavi M et al 2014 | Nonrandomised prospective observational study | Stable coronary artery disease with normal left ventricular function                                                                                         | 148 patients   | Ramadan fasting      | To investigate the effects of Ramadan fasting in patients with coronary artery disease                                                                                  | 1 month (Ramadan) | -Mean age of the cohort was 61.5 years. 50% were male<br>-66% of patients completed Ramadan fast with an average of 22 days of fasting<br>-Chest pain and shortness of breath occurrence was not significantly different between the fasting and non-fasting groups                                                                                                                      | Patients with coronary artery disease were able to observe the Ramadan fast safely and their combined endpoint of chest pain and dyspnoea was not significantly different from that of the non-fasting ones. The authors suggest that patients with stable coronary artery disease and normal left ventricular function could fast during Ramadan. |
| Nematy M et al 2012  | Prospective observational study               | Patients with at least one cardiovascular risk factor (previous coronary artery disease, metabolic syndrome or cerebrovascular disease in the last 10 years) | 82 patients    | Ramadan fasting      | The association of Ramadan fasting and cardiovascular risk factors                                                                                                      | 1 month           | -A significant improvement in 10 years coronary heart disease risk (based on the Framingham risk score) was found in patients undergoing Ramadan fasting.<br>-Patients undergoing Ramadan fasting had a significantly higher high-density lipoprotein and lower plasma cholesterol, triglyceride level, systolic blood pressure, body mass index and waist circumference ( $p < 0.05$ ). | A significant improvement in 10 years coronary heart disease risk score and other cardiovascular risk factors were noted after Ramadan fasting in patients with at least one cardiovascular risk factor.                                                                                                                                           |
| Salam A et al 2017   | Prospective multi-centre study                | Patients hospitalised with acute heart failure                                                                                                               | 4,157 patients | Ramadan fasting      | The association of Ramadan fasting with outcomes in patients with                                                                                                       | 12 months         | -306 (7.4%) patients were hospitalised with acute heart failure in the month of Ramadan in 2012.<br>-3,851 (92.6%) patients were hospitalised with acute heart failure outside of Ramadan in the period of February to November 2012.                                                                                                                                                    | This study represents (at the time of publication) the largest evaluation of the effects of fasting on acute heart failure. It reported an improved volume status in fasting patients. There were also                                                                                                                                             |

|                       |                                     |                                                              |                |                            |                                                                                                                                       |                               |                                                                                                                                                                                                                                                                                                                                                                                                                             |                                                                                                                   |
|-----------------------|-------------------------------------|--------------------------------------------------------------|----------------|----------------------------|---------------------------------------------------------------------------------------------------------------------------------------|-------------------------------|-----------------------------------------------------------------------------------------------------------------------------------------------------------------------------------------------------------------------------------------------------------------------------------------------------------------------------------------------------------------------------------------------------------------------------|-------------------------------------------------------------------------------------------------------------------|
|                       |                                     |                                                              |                |                            | acute heart failure                                                                                                                   |                               | -Patients admitted with acute heart failure during Ramadan had significantly lower prevalence of symptoms and signs of volume overload compared to patients hospitalised in other months.<br>-Atrial arrhythmias were significantly less frequent and cholesterol levels were significantly lower in Ramadan.<br>-Hospitalisation in Ramadan was not independently associated with increased immediate or 1-year mortality. | favourable effects on atrial arrhythmias and total cholesterol and no effects on immediate or long-term outcomes. |
| Temizhan A et al 1999 | Retrospective review                | Acute coronary syndrome                                      | 1,655 patients | Ramadan fasting (indirect) | The incidence of acute coronary syndrome in Ramadan in comparison to the remainder of the year in a geographically defined population | 6 years                       | The incidence of acute coronary syndrome was significantly lower in Ramadan from 1991 to 1997 in a single centre in Turkey.                                                                                                                                                                                                                                                                                                 | The authors speculate that Ramadan fasting does not increase acute coronary syndrome.                             |
| Turin T et al 2016    | Systematic review and meta-analysis | Coronary heart disease<br>Stroke<br>Congestive heart failure | 1,019 patients | Ramadan fasting            | To present a summary of key findings of all the published data on Ramadan fasting in patients with cardiovascular disease             | Fifteen studies were selected | The incidence of cardiovascular events during Ramadan was similar to those found in the remaining, non-fasting, months of the year.                                                                                                                                                                                                                                                                                         | Ramadan fasting is not associated with any change in incidence of acute cardiovascular disease.                   |

### References

Abazid, R. M., Khalaf, H. H., Sakr, H. I., Altorbak, N. A., Alenzi, H. S., Awad, Z. M., Smettei, O. A., Elsanan, M. A., Widyana, A. M., Azazy, A. S., & Chamsi-Pasha, H. W. (2018). Effects of Ramadan fasting on the symptoms of chronic heart failure. *Saudi medical journal*, 39(4), 395–400. <https://doi.org/10.15537/smj.2018.4.22011>

Al Suwaidi J, Zubaid M, Al-Mahmeed WA, Al-Rashdan I, Amin H, Bener A, Hadi HR, Helmy A, Hanifah M, Al-Binali HA. Impact of fasting in Ramadan in patients with cardiac disease. *Saudi Med J*. 2005 Oct;26(10):1579-83. PMID: 16228059.

Aslam M, Healy MA. Compliance and drug therapy in fasting Moslem patients. *J Clin Hosp Pharm*. 1986 Oct;11(5):321-5. doi: 10.1111/j.1365-2710.1986.tb00859.x. PMID: 3782478.

Babineaux SM, Toaima D, Boye KS, Zagar A, Tahbaz A, Jabbar A, Hassanein M. Multi-country retrospective observational study of the management and outcomes of patients with Type 2 diabetes during Ramadan in 2010 (CREED). *Diabet Med*. 2015 Jun;32(6):819-28. doi: 10.1111/dme.12685. Epub 2015 Apr 10. PMID: 25581456; PMCID: PMC6681420.

Batarfi A, Alenezi H, Alshehri A, Balelah S, Kazim H, Alghami M, Hussain MM, Alshehri N, Alsharif R, Ashour H, Althobaiti M, Alotaibi S, Steinmetz H, Foerch C. Patient-guided modifications of oral anticoagulant drug intake during Ramadan fasting: a multicenter cross-sectional study. *J Thromb Thrombolysis*. 2021 Feb;51(2):485-493. doi: 10.1007/s11239-020-02218-0. PMID: 32666427.

Kul S, Savaş E, Öztürk ZA, Karadağ G. Does Ramadan fasting alter body weight and blood lipids and fasting blood glucose in a healthy population? A meta-analysis. *J Relig Health*. 2014 Jun;53(3):929-42. doi: 10.1007/s10943-013-9687-0. PMID: 23423818.

Okoshi, K., Cezar, M., Polin, M., Paladino, J. R., Jr, Martinez, P. F., Oliveira, S. A., Jr, Lima, A., Damatto, R. L., Paiva, S., Zornoff, L., & Okoshi, M. P. (2019). Influence of intermittent fasting on myocardial infarction-induced cardiac remodeling. *BMC cardiovascular disorders*, 19(1), 126. <https://doi.org/10.1186/s12872-019-1113-4>

Ma X, Mani K, Liu H, Kovacs A, Murphy JT, Foroughi L, French BA, Weinheimer CJ, Kraja A, Benjamin IJ, Hill JA, Javaheri A, Diwan A. Transcription Factor EB Activation Rescues Advanced  $\alpha$ B-Crystallin Mutation-Induced Cardiomyopathy by Normalizing Desmin Localization. *J Am Heart Assoc*. 2019 Feb 19;8(4):e010866. doi: 10.1161/JAHA.118.010866. PMID: 30773991; PMCID: PMC6405666.

Mousavi M, Mirkarimi S, Rahmani G, Hosseinzadeh E, Salahi N. Ramadan fast in patients with coronary artery disease. *Iran Red Crescent Med J*. 2014 Dec 8;16(12):e7887. doi: 10.5812/ircmj.7887. PMID: 25763250; PMCID: PMC4341245.

Nematy M, Alinezhad-Namaghi M, Rashed MM, Mozhdehifard M, Sajjadi SS, Akhlaghi S, Sabery M, Mohajeri SA, Shalae N, Moohebaty M, Norouzy A. Effects of Ramadan fasting on cardiovascular risk factors: a prospective observational study. *Nutr J*. 2012 Sep 10;11:69. doi: 10.1186/1475-2891-11-69. PMID: 22963582; PMCID: PMC3487759.

Salam A, Sulaiman K, Alawi A. Alsheikh-Ali, Rajvir Singh, Nidal Asaad, Awad Al-Qahtani, Imtiaz Salim, Khalid F AlHabib, Ibrahim Al-Zakwani, Mohammed Al-Jarallah, Wael AlMahmeed, Bassam Bulbanat, Mustafa Ridha, Nooshin Bazargani, Haitham Amin, Ahmed Al-Motarreb, Husam Al Faleh, Hanan Albackr, Prashanth Panduranga, Abdulla Shehab & Jassim Al Suwaidi (2018) Acute heart failure presentations and outcomes during the fasting month of Ramadan: an observational report from seven Middle Eastern countries, *Current Medical Research and Opinion*, 34:2, 237-245, DOI: [10.1080/03007995.2017.1376629](https://doi.org/10.1080/03007995.2017.1376629)

Temizhan A, Dönderici O, Ouz D, Demirbas B. Is there any effect of Ramadan fasting on acute coronary heart disease events? *Int J Cardiol*. 1999 Jul 31;70(2):149-53. doi: 10.1016/s0167-5273(99)00082-0. PMID: 10454303.

Turin, T. C., Ahmed, S., Shommu, N. S., Afzal, A. R., Al Mamun, M., Qasqas, M., Rumana, N., Vaska, M., & Berka, N. (2016). Ramadan fasting is not usually associated with the risk of cardiovascular events: A systematic review and meta-analysis. *Journal of family & community medicine*, 23(2), 73–81. <https://doi.org/10.4103/2230-8229.181006>
